# Supplementary material
Source: publisher figshare collection journal article supplement (https://acs.figshare.com/ndownloader/files/3675261)
Supplement: Supplementary file 1 [file 3675261]

**SUPPORTING INFORMATION**

**ENVIRONMENTAL SCIENCE AND TECHNOLOGY**

Arsenic biotransformation in solid waste residue: comparison of contributions from  
bacteria with arsenate and iron reducing pathways

Haixia Tian, Qiantao Shi, Chuanyong Jing\*

State Key Laboratory of Environmental Chemistry and Ecotoxicology, Research Center  
for Eco-Environmental Sciences, Chinese Academy of Sciences, Beijing 100085, China

Tel: +86 10 6284 9523; Fax: +86 10 6284 9523

E-mail: cyjing@rcees.ac.cn

January 16, 2015

● 7 Pages (including cover page)

● 4 Figures

● 6 Tables

**LB broth (1L)** 10 g tryptone, 5 g yeast extract, and 10 g NaCl were dissolved in 1 L deionized (DI) water. The pH of the medium was adjusted to 7.0 using 1 mol/L NaOH.

**CDM broth (1L)** The CDM medium contained the following:  $K_2HPO_4$  (0.225),  $KH_2PO_4$  (0.225), NaCl (0.46),  $(NH_4)_2SO_4$  (0.225),  $MgSO_4 \cdot 7H_2O$  (0.117), yeast extract (1.0), Na lactate (2.24),  $Na_3AsO_4 \cdot 12H_2O$  (0.424), and  $NaHCO_3$  (4.2) (all in grams per liter); trace element solution (1.0 mL); and vitamin solution (10 mL).<sup>1</sup>

**Metal resistant ability** The purpose of choosing different solid to liquid ratios was to compare the effect of different bacteria on arsenic mobility at the maximum level of toxic metals they could tolerate. The solid waste residue has various heavy metals with extremely high concentrations which is toxic to bacteria cell and will affect bacteria growth. Therefore, we performed series of preliminary experiments to find a maximum solid to liquid ratio where bacteria can survive and maintain their functionality. As shown in Table S4-6, different residue concentrations (0.4-15 g/L) were applied for strain IMH, OhILAs, and MR-1 in the preliminary incubation experiments. For the As(V) reducing bacteria (IMH and OhILAs), the As(III) ratio in the aqueous phase was measured. For the iron reducer (MR-1), the Fe(II) ratio was determined. The results show that the reduction capacity for As(V) or Fe(III) dramatically decreased when the solid concentration was higher than a threshold value. This critical concentration (10 g/L for strain IMH, 1 g/L for OhILAs and 2 g/L for MR-1) was then used in our incubation experiments.

**SEM sample preparation** The sample was first stabilized by 2.5% glutaraldehyde solution prepared in 0.2 M phosphate buffer (pH 7.4) and then incubated at 4°C overnight. After the fixation step, samples were rinsed with 0.1 M phosphate buffer (pH 7.4) three times for 20 min each time. Then,

samples were re-fixed by 1% osmic acid for 2-4 h and re-rinsed with 0.1 M phosphate buffer (pH 7.4) three times for 15 min each time. After the double fixation step, samples were dehydrated with a graded series of ethanol including 30%, 50%, 70%, 80%, 90% and 95% ethanol/water once for 15 min, and 100% ethanol twice for 20 min. The third step is replacement. Samples were immersed in isoamyl acetate twice for 15 min. The last step is drying. Samples were dried according to a procedure called critical point drying (CPD). Finally, the powder samples were mounted on aluminum stubs using double-sided tape and were ready to be viewed in the SEM (FESEM, Hitachi SU8020, Tokyo, Japan).

**XRD analysis** X-ray powder diffraction (XRD) patterns of the solid residual samples were recorded using an X'Pert PRO (PANalytical, The Netherlands) instrument in Bragg-Brentano geometry with iron-filtered Cu K $\alpha$  radiation (40 kV, 30 mA). Samples were placed on a rotating zero-background holder made of single-crystal Si, gently pressed to obtain a sample thickness of about 0.5 mm, and scanned in the  $2\theta$  range of 10° to 90° with a step size of 0.02° and a count time of 2 s per step. The analyses of the XRPD patterns were performed using the PDF-2 reference database from the International Center for Diffraction Data (ICDD).

**Fe(III) reduction by strain OhILAs** Ferrihydrite was prepared according to the method suggested by Jiang and Lee, with slight modification.<sup>2</sup> Briefly, ferric chloride solution (0.1 M FeCl<sub>3</sub>) was slowly titrated with 1.0 M NaOH to pH 7, and the resulting dark brown precipitate was washed with DI water ten times and stored after freeze-drying. The XRD analysis showed that the synthesized ferrihydrite is the 2-line product (Fig. S3).

The capacity of iron reduction by strain OhILAs was measured under anaerobic conditions. Strain OhILAs was inoculated in the CDM medium containing 100 mg/L ferrihydrite and incubated in the

darkness without agitation at 30°C for 120 h. Suspension samples were periodically collected to determine the concentration of aqueous Fe(II).

**Table S1.** Basic properties of the bacteria used in the incubation experiments.

| Strain                                | Oxygen condition | Growth medium | As(V) reduction related genes | Fe(III) reducing ability | SO <sub>4</sub> <sup>2-</sup> reducing ability | Source                          |
|---------------------------------------|------------------|---------------|-------------------------------|--------------------------|------------------------------------------------|---------------------------------|
| <i>Pantoea</i> sp. IMH                | Aerobic          | LB            | <i>arsC</i> (KM233198)        | No                       | No                                             | Isolated from soil <sup>3</sup> |
| <i>Shewanella oneidensis</i> MR-1     | Anaerobic        | LB            | <i>arsC</i> (SO_2871)         | Yes                      | Yes                                            | Donated from Dr. Gao Haichun    |
| <i>Alkaliphilus oremlandii</i> OhILAs | Anaerobic        | CDM           | <i>ArrA</i> <sup>4</sup>      | Yes                      | No                                             | Obtained from ATCC (BAA-1360™)  |

**Table S2.** Metal concentration in the solid waste residue.

| Element        | As  | Fe   | Zn  | Pb  | Cu   | Cd  | Ca    |
|----------------|-----|------|-----|-----|------|-----|-------|
| Content (mg/g) | 9.5 | 27.5 | 3.8 | 0.5 | 11.7 | 3.1 | 215.7 |

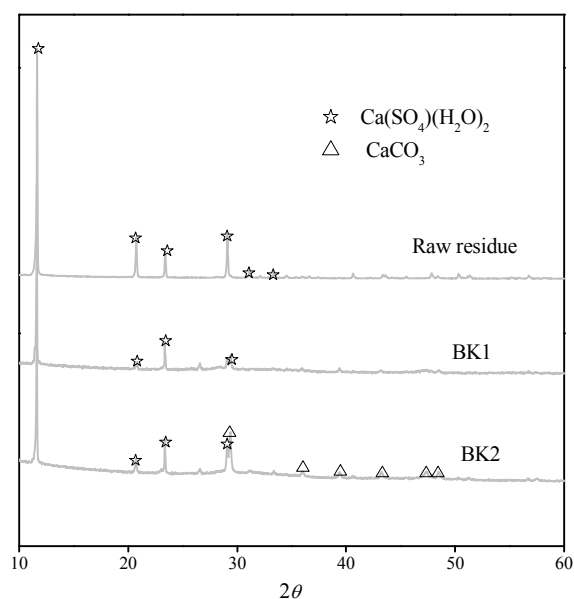

**Figure S1.** XRD patterns of the residue affected by culture media.

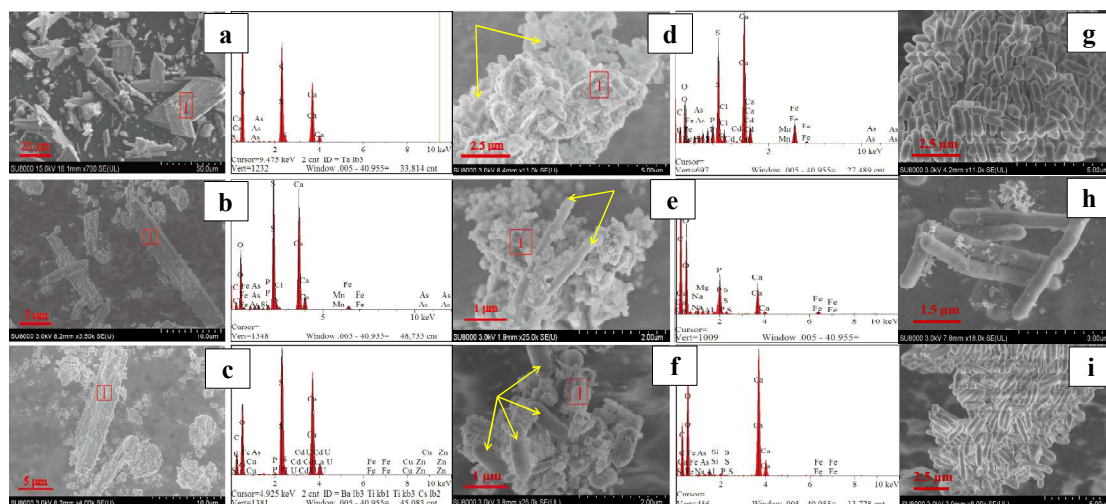

**Figure S2.** SEM images of the residue incubated with the three bacteria (a: raw residue; b: BK1; c: BK2; d: IMH; e: OhILAs; f: MR-1) and the original bacteria cells (g: IMH; h: OhILAs; i: MR-1)

**Table S3.** Metal release percent in residue affected by the three bacteria (%)

| Metal | IMH  | OhILAs | MR-1 |
|-------|------|--------|------|
| As    | 15.1 | 16.8   | 40.0 |
| Fe    | 0.6  | 3.7    | 39.9 |
| Ca    | 41.3 | 8.9    | 46.4 |
| Cu    | 21.3 | 0.2    | 21.0 |
| Zn    | 7.7  | 0.4    | 22.1 |
| Cd    | 53.1 | 0.0    | 97.4 |
| Pb    | 0.7  | 0.5    | 9.8  |

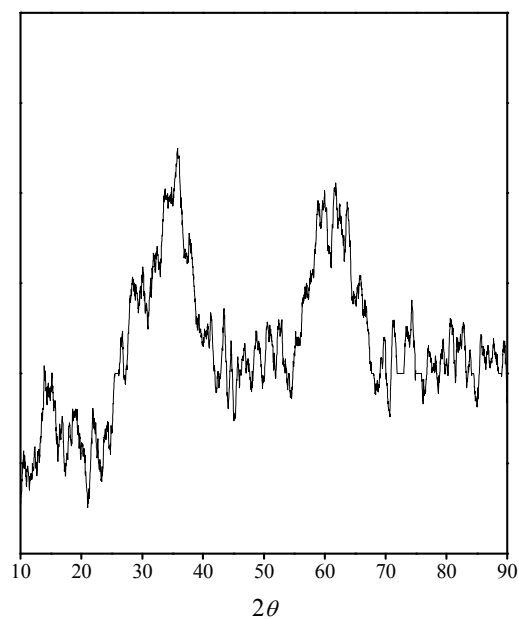

**Figure S3.** XRD pattern of ferrihydrite synthesized in this work.

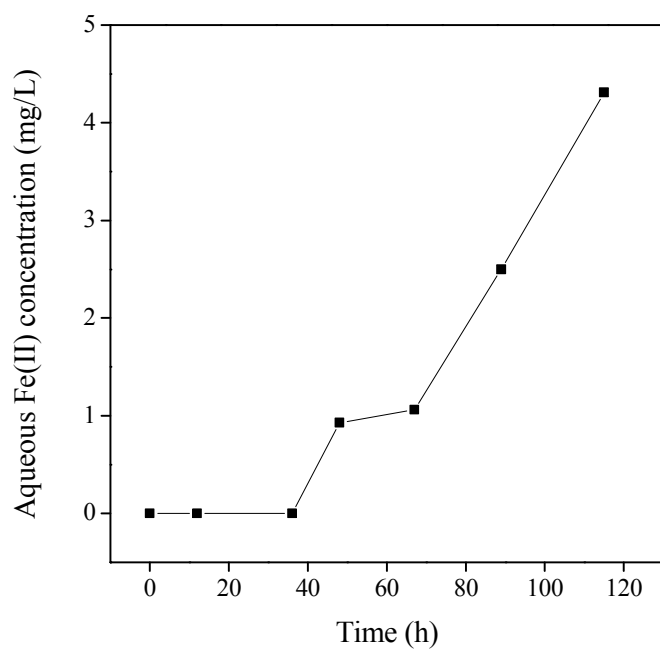

**Figure S4.** Reduction of ferrihydrite by strain OhILAs.

Table S4. As(V) reduction ratio by IMH in different solid waste concentrations

| Items                           | IMH |     |     |    |
|---------------------------------|-----|-----|-----|----|
| Solid waste concentration (g/L) | 4   | 8   | 10  | 15 |
| As(III) ratio* (%)              | 100 | 100 | 100 | 18 |

\*: As(III) ratio was determined after 36 h incubation.

Table S5. As(V) reduction ratio by OhILAs in different solid waste concentrations

| Items                           | OhILAs |     |    |    |
|---------------------------------|--------|-----|----|----|
| Solid waste concentration (g/L) | 0.1    | 0.5 | 1  | 2  |
| As(III) ratio* (%)              | 100    | 87  | 83 | 20 |

\*: As(III) ratio was determined after 72 h incubation.

Table S6. Fe(III) reduction ratio by MR-1 in different solid waste concentrations

| Items                           | MR-1 |     |    |    |    |
|---------------------------------|------|-----|----|----|----|
| Solid waste concentration (g/L) | 0.4  | 0.8 | 2  | 4  | 6  |
| Fe(II) ratio* (%)               | 100  | 100 | 96 | 30 | 10 |

\*: Fe(II) ratio was determined after 72 h incubation.

## REFERENCES

- (1) Laverman, A. M.; Blum, J. S.; Schaefer, J. K.; Phillips, E.; Lovley, D. R.; Oremland, R. S. Growth of strain SES-3 with arsenate and other diverse electron acceptors. *Appl. Environ. Microbiol.* **1995**, *61* (10), 3556–3561.
- (2) Jiang, S.; Lee, J.-H.; Kim, D.; Kanaly, R. A.; Kim, M.-G.; Hur, H.-G. Differential arsenic mobilization from As-bearing ferrihydrite by iron-respiring *Shewanella* strains with different arsenic-reducing activities. *Environ. Sci. Technol.* **2013**, *47* (15), 8616–8623.
- (3) Wu, Q.; Du, J.; Zhuang, G.; Jing, C. *Bacillus* sp. SXB and *Pantoea* sp. IMH, aerobic As(V)-reducing bacteria isolated from arsenic-contaminated soil. *J. Appl. Microbiol.* **2013**, *114* (3), 713–721.
- (4) Fisher, E.; Dawson, A. M.; Polshyna, G.; Lisak, J.; Crable, B.; Perera, E.; Ranganathan, M.; Thangavelu, M.; Basu, P.; Stolz, J. F. Transformation of inorganic and organic arsenic by *Alkaliphilus oremlandii* sp. nov. strain OhILAs. *Ann. N.Y. Acad. Sci.* **2008**, *1125* (1), 230–241.
